# Supplementary material for: A single light spot GC detector employing localized surface plasmon resonance of porous Au@SiO2 nanoparticle multilayer
Source: Royal Society of Chemistry journal article supplement (doi:10.1039/c8an01921e), 2018-11-30
Supplement: c8an01921e1.pdf [file c8an01921e1.pdf]

Electronic Supporting Information for Analyst

**A Single Light Spot GC Detector Employing Localized Surface Plasmon Resonance of Porous Au@SiO<sub>2</sub> Nanoparticle Multilayer**

Pei-Yin Lin, Guarn-Yi Le, Wei-I Chiu, Rih-Sheng Jian, and Chia-Jung Lu\*

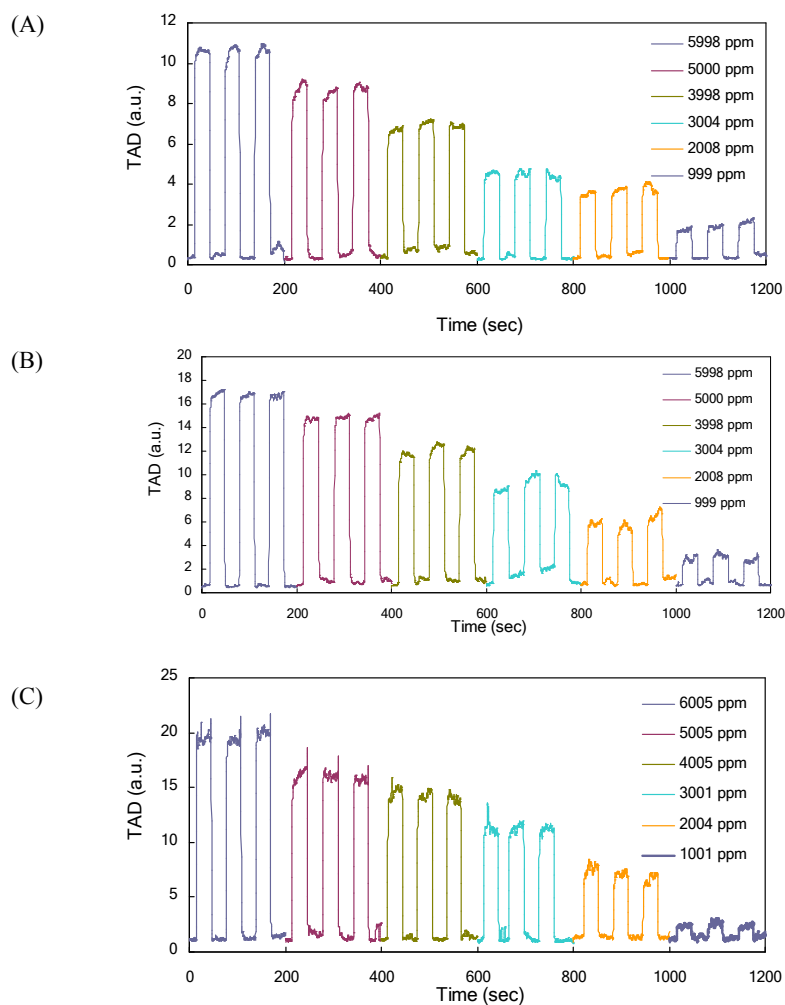

Fig. S1 *m*-Xylene response signals for LSPR sensors with different number of Au@SiO<sub>2</sub> multilayers. (A) two layers, (B) three layers, (C) four layers.

Table S1. Response times of Au@SiO<sub>2</sub> LSPR sensors with different number of layers

| # of layers     | 1    | 2    | 3    | 4    | 5    |
|-----------------|------|------|------|------|------|
| T <sub>90</sub> | 0.97 | 1.47 | 1.01 | 0.99 | 1.14 |
| T <sub>20</sub> | 1.46 | 1.7  | 1.52 | 1.42 | 1.22 |

\* Response time unit in seconds

T<sub>90</sub>: Time required from baseline to reaching 90% response equilibrium.

T<sub>20</sub>: Time required from response equilibrium returning to 20% response above baseline.

Table S2. Comparison of signal and noise enhancement of multilayer and monolayer GC detector

|         | <u>monolayer</u> |       |      | <u>multilayer</u> |       |      | <u>improvement</u> |       |     |
|---------|------------------|-------|------|-------------------|-------|------|--------------------|-------|-----|
|         | signal           | noise | S/N  | signal            | noise | S/N  | signal             | noise | S/N |
| toluene | 3946             | 251   | 15.7 | 50819             | 751   | 67.7 | 12.8               | 3.0   | 4.3 |
| xylene  | 5554             | 251   | 22.1 | 66456             | 751   | 88.5 | 11.9               | 3.0   | 4.0 |

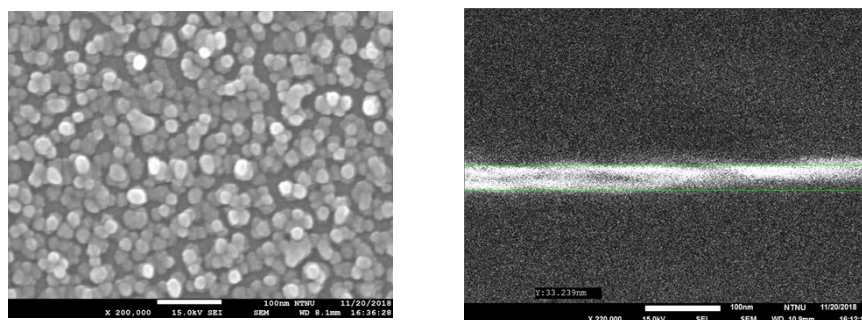

Fig. S2 Front image and side view SEM image of Au@SiO<sub>2</sub> multilayer. The effective thickness is approximately 40 nm.

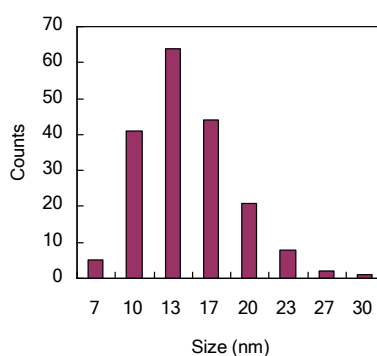

Fig. S3 Histogram for size analysis based on monolayer FESEM image. The sizes of Au nanoparticles are mainly distributed around 13±3 nm.

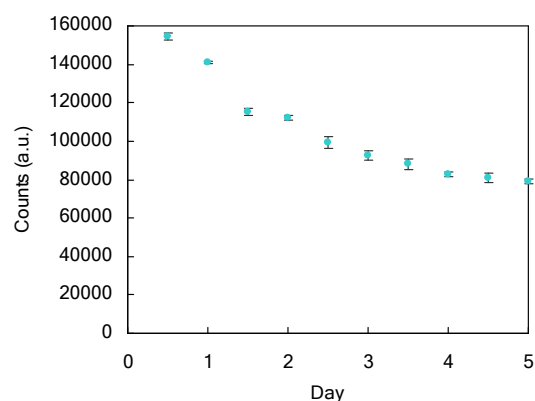

Fig. S4 Five-days continuous tracking of Au@SiO<sub>2</sub> multilayer responses to 4545 ppm *m*-xylene.

Note: Two sets of measurements are performed each day: one in the morning and one in the evening. There are 5 replicates in each set of measurement ( $n=5$  for each point in above figure). As can be seen in this figure, the sensitivity of detector decays rapidly at first two days and gradually reaches stable responses at 4-5 days. This data suggest that the newly synthesized multilayer might need a few days to reach steady state.

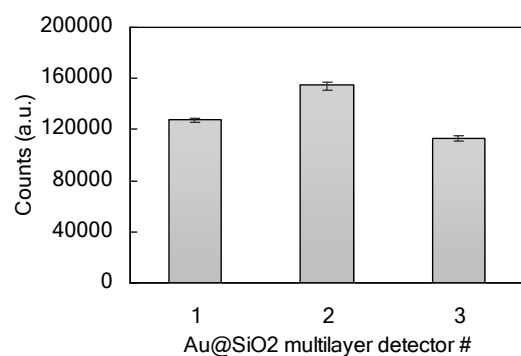

Fig. S5 Comparison among three different Au@SiO<sub>2</sub> multilayer detectors (4545 ppm *m*-xylene,  $n=5$  for each detector).

Note: Three hand-made detectors were fabricated and run the side-by-side test with same *m*-xylene sample. Each detector was tested five times for its own stability measurements. Although there are some discrepancies among these three detectors, all three of them can provide significant responses to *m*-xylene.
